# Supplementary material for: Transcriptional response of rice flag leaves to restricted external phosphorus supply during grain filling in rice cv. IR64
Source: PLOS journal article supplement (doi:10.1371/journal.pone.0203654), 2018-09-13
Supplement: S4 (10.1371/journal.pone.0203654.s004) [file journal.pone.0203654.s004]

**Supplementary Table S1.** Concentration of total phosphorus and phosphorus fractions in flag leaves, and photosynthetic rate in sampled flag leaves.

|                                                                             | T8                      | C8                     | T16                    | C16                    |
|-----------------------------------------------------------------------------|-------------------------|------------------------|------------------------|------------------------|
| Total P concentration (mg g <sup>-1</sup> )                                 | 1.13±0.02 <sup>a*</sup> | 1.26±0.09 <sup>a</sup> | 1.04±0.03 <sup>a</sup> | 1.15±0.06 <sup>a</sup> |
| Lipid P concentration (mg g <sup>-1</sup> )                                 | 0.35±0.03 <sup>a</sup>  | 0.44±0.03 <sup>a</sup> | 0.27±0.01 <sup>a</sup> | 0.35±0.03 <sup>a</sup> |
| Metabolic P concentration (mg g <sup>-1</sup> )                             | 0.18±0.01 <sup>a</sup>  | 0.17±0.02 <sup>a</sup> | 0.10±0.00 <sup>a</sup> | 0.14±0.02 <sup>a</sup> |
| Nucleic P concentration (mg g <sup>-1</sup> )                               | 0.41±0.03 <sup>a</sup>  | 0.37±0.05 <sup>a</sup> | 0.38±0.01 <sup>a</sup> | 0.39±0.02 <sup>a</sup> |
| Residue P concentration (mg g <sup>-1</sup> )                               | 0.07±0.01 <sup>a</sup>  | 0.06±0.01 <sup>a</sup> | 0.06±0.00 <sup>a</sup> | 0.06±0.00 <sup>a</sup> |
| Inorganic P concentration (mg g <sup>-1</sup> )                             | 0.20±0.01 <sup>a</sup>  | 0.21±0.01 <sup>a</sup> | 0.19±0.05 <sup>a</sup> | 0.20±0.00 <sup>a</sup> |
| Photosynthetic rate (μmol CO <sub>2</sub> m <sup>-2</sup> s <sup>-1</sup> ) | 14.11±0.5 <sup>a</sup>  | 14.55±0.3 <sup>a</sup> | 7.49±0.5 <sup>b</sup>  | 14.83±0.6 <sup>a</sup> |

\* Statistical analysis was calculated individually by the sample T8 vs C8, T16 vs C16, means that do not share a common letter are significantly different at P < 0.05 (n=3).
